# Supplementary material for: TBO Degradation by Heterogeneous Fenton-like Reaction Using Fe Supported over Activated Carbon
Source: MDPI journal article supplement (doi:10.3390/catal11121456), 2021-11-29
Supplement: s1 [file s1]

# TBO degradation by heterogeneous Fenton-like reaction using Fe supported over activated carbon

Brahim Samir<sup>1\*</sup>, Soumia Bakhta<sup>2</sup>, Nabil Bouazizi<sup>1</sup>, Zahra Sadaoui<sup>2</sup>, Ouiza Allalou<sup>2</sup>, Franck Le Derf<sup>1</sup>,

Julien Vieillard<sup>1</sup>

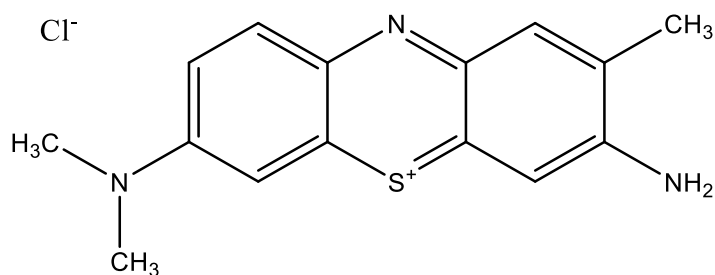

**Scheme S1** : Chemical structure of TBO dye

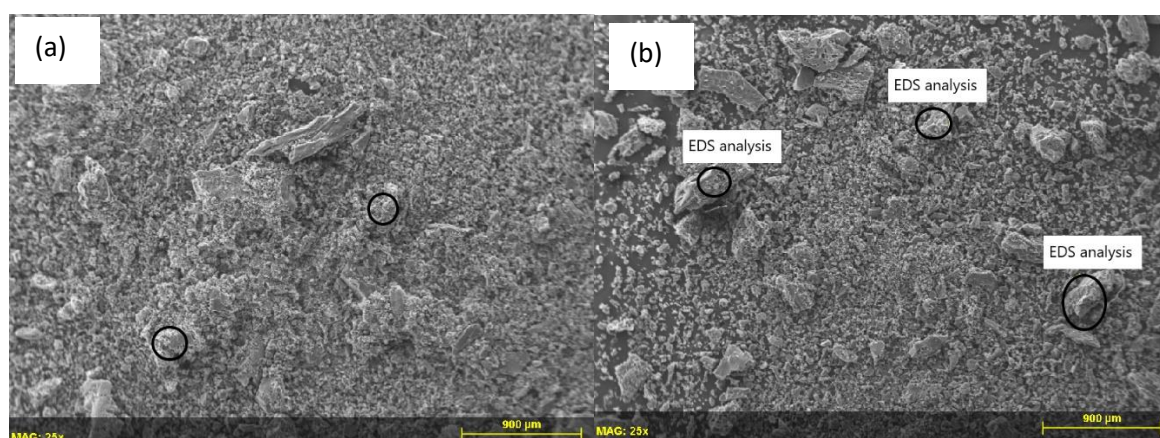

Figure S1: focus on the area targeted for EDS analysis of Ac (a) and AC-Fe (b).

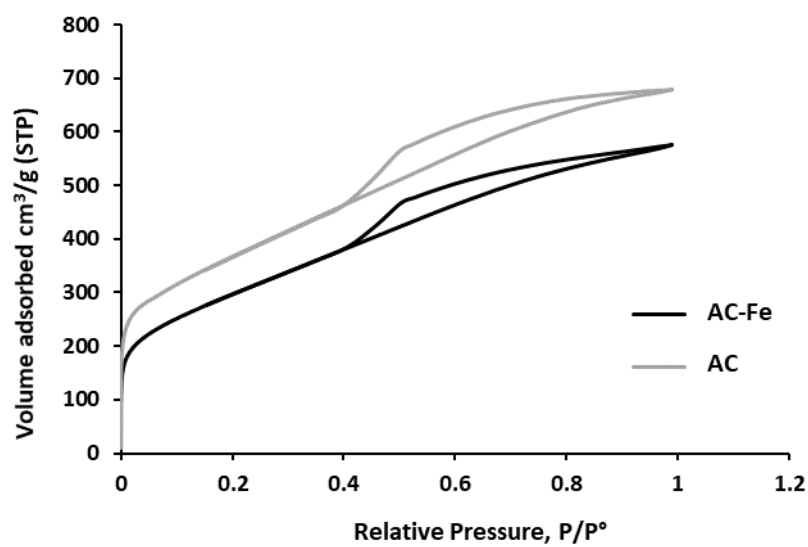

Figure S2: BET nitrogen adsorption-desorption isotherms for AC and AC-Fe

Table S1: concentration of Fe released during consecutive cycle

| Number of cycle | Content of Fe released (mg/L) |
|-----------------|-------------------------------|
| 1               | 0.1534                        |
| 2               | 0.0957                        |
| 3               | 0.0528                        |
