# Supplementary material for: TBO Degradation by Heterogeneous Fenton-like Reaction Using Fe Supported over Activated Carbon
Source: MDPI journal article supplement (doi:10.3390/catal11121456), 2021-11-29
Supplement: s1 [file s1]

Archive with 1 entries (1 files):
- catalysts-1459901-supplementary.pdf
